# Supplementary material for: Polygenic Health Index, General Health, Pleiotropy, Embryo Selection and Disease Risk
Source: bioRxiv or medRxiv preprint supplement (doi:10.1101/2022.06.15.22276102), 2022-06-23
Supplement: Supplementary file [file media-1.pdf]

1 Polygenic Health Index, General Health, and Disease Risk —  
2 Supplementary Information

3 Erik Widen, Louis Lello, Timothy G. Raben,  
4 Laurent C. A. M. Tellier, Stephen D. H. Hsu

4 **Contents**

|    |                                                      |          |
|----|------------------------------------------------------|----------|
| 5  | <b>1 Data set</b>                                    | <b>1</b> |
| 6  | 1.1 Phenotype definitions . . . . .                  | 1        |
| 7  | 1.2 Test set demographics . . . . .                  | 2        |
| 8  | <b>2 Predictor Specifics</b>                         | <b>3</b> |
| 9  | 2.1 Individual Predictor Construction . . . . .      | 3        |
| 10 | 2.2 AUC evaluation . . . . .                         | 6        |
| 11 | <b>3 Additional Selection Experiments</b>            | <b>6</b> |
| 12 | 3.1 Selection experiments in genetic trios . . . . . | 6        |
| 13 | 3.2 Sex bias adjusted health index . . . . .         | 6        |
| 14 | 3.3 Non-European ancestry . . . . .                  | 8        |

15 **1 Data set**

16 **1.1 Phenotype definitions**

17 The disease definitions used various UKB-fields to define case and control status, where an  
18 individual with any of the diagnoses or data fields filled was counted as a case for that disease.  
19 The definitions used the ICD9, ICD10 and OPCS4 codes in UKB-fields 41271, 41270, 41272;  
20 self-reported non-cancer codes from UKB-field 20002 and cancer codes in UKB-field 20001.  
21 Additionally, some diseases were specifically included in the intake questionnaire or otherwise  
22 used other UKB-fields, which also are listed below.

23 Most definitions did not use all possible fields such that the UKB was partly underused,  
24 i.e., there are cases that incorrectly passed as controls for many of the diseases. There might  
25 thus be some quantitative performance gains should the predictors be retrained and validated  
26 on more comprehensive phenotype definitions.

27 Furthermore, training and evaluation of the predictors used different data updates from  
28 UKB as more data successively become available. The UKB-trained predictors used a down-  
29 load date of April 2019, whereas the evaluation used data from a download date of April  
30 2021 (AFib and CAD were exceptions using the evaluation data also in training). The latter  
31 download date had significantly more cases for some of the diseases and it is these numbers  
32 that are reported in the paper. The following disease defintions were used:

33 **Alzheimer's Disease** ICD10: F000-F009, G300-G309

34 **Asthma** non-cancer codes: 1111

35 **Atrial fibrillation** non-cancer codes: 1471, 1483; ICD10: I48, I480-I484, I489; ICD9:  
36 4273; OPCS4: K571, K621-K624

37 **Basal cell carcinoma** cancer codes: 1061

38 **Breast cancer** cancer codes: 1002

39 **Coronary artery disease** non-cancer codes: 1075; ICD9: 410, 4109, 412, 4129; ICD10:  
40 I21, I210-I214, I219, I21X, I22, I220, I221, I228, I229, I23, I230-I236, I238, I241,  
41 I252; OPCS4: K401-K404, K411-K414, K451-K455, K491, K492, K498, K499, K502, K751-K754,  
42 K758, K759

43 **Diabetes type I** ICD10: E100-E109

44 **Diabetes type II** ICD10: E110-E119

45 **Gout** non-cancer codes: 1466

46 **Heart attack** non-cancer codes: 1075

47 **Hypercholesterolemia** non-cancer codes: 1473

48 **Hypertension** non-cancer codes: 1065

49 **Inflammatory bowel disease** ICD10: K500-K509, K510-K519

50 **Ischemic stroke** ICD10: I630-I639

51 **Major depressive disorder** ICD10: F320-F329, F330-339, F340-F349, F380-F389, F390-F399

52 **Malignant melanoma** cancer codes: 1059

53 **Obesity** UKB-field 2100 where a (weight and height based) BMI over 30 counts a case.

54 **Prostate cancer** cancer codes: 1044

55 **Schizophrenia** ICD10: F220-F209; UKB-field: 20544 having coding 2.

56 **Testicular cancer** cancer codes: 1045

## 57 1.2 Test set demographics

58 The test data set consisted of 39,913 self-reported white individuals, 23,110 females and 16,803  
59 males, with mean age 70.4 years at data download (2021) and a standard deviation of 7.3  
60 years. A plot of the age histograms can be found in **Figure 1**.

61 The disease prevalences in the test set are shown in the same figure, to the right. The  
62 UKB population is generally healthier than the general U.S. white population. Furthermore,  
63 the disease prevalence in the data set is only an approximation for the lifetime risks, as most  
64 participants still may develop any of the conditions in the future. The non-comprehensive

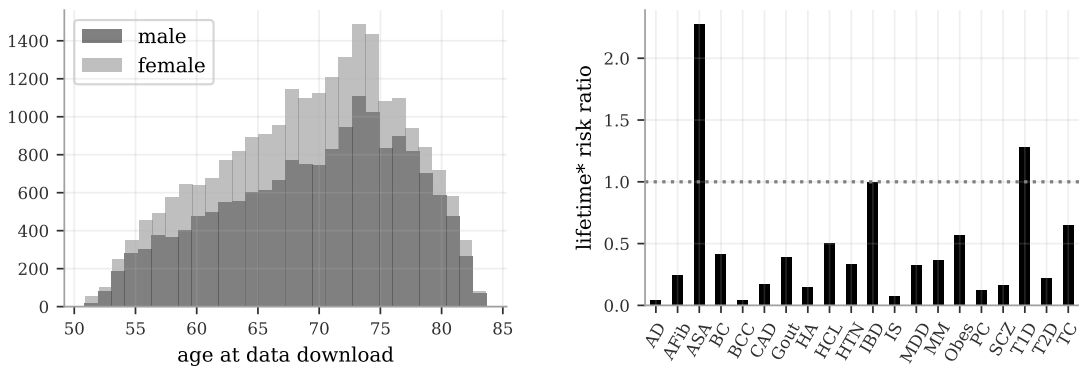

**Figure 1: Age histograms and lifetime\* risks of the test set. Left:** The age histograms of the test set for males and females. Most participants are late in life. \* Many diseases have late onset however and the UKB lifetime risks are therefore underestimates. Similarly, the evaluations are measuring case status up to data collection without taking age or censoring into account. **Right:** The ratio between UKB lifetime risk estimates and lifetime risks for the white U.S. population, i.e., the lifetime prevalence up to data collection in UKB divided by literature estimates of lifetime risks in the white U.S. population. The ratios are generally much smaller than the reference line at ratio 1.0. The absolute values of both UKB and U.S. prevalences are shown in **Figure 2**.

65 disease definitions used also undercount the number of cases in UKB. For the sake of the  
 66 index construction, we used literature values for the lifetime risks  $\rho_d$ . **Figure 1** shows to the  
 67 right the UKB prevalences relative to the general white U.S. population. The absolute values  
 68 for both lifespan impact weights  $l_d$  and the lifetime risks  $\rho_d$  used in the index can be found  
 69 in **Figure 2**.

70 Note that the frequently used metric RRR is dependent on the prevalence in a selection  
 71 experiment. This is shown in **Figure 3** for theoretical RRR based on a predictor with AUC  
 72 0.64. The RRR resulting from a selection experiment decreases with higher prevalence. The  
 73 precise RRR values are therefore dependent on the absolute prevalences in the population an  
 74 index is evaluated on.

75 The index construction also includes the related lifetime risks  $\rho_d$  as parameters. We chose  
 76 literature estimates for the general white U.S. population for these, rather than using the  
 77 UKB prevalences as estimates.

## 78 2 Predictor Specifics

### 79 2.1 Individual Predictor Construction

80 Most of the predictors used in this paper were trained with the LASSO algorithm on the UK  
 81 Biobank, using the methods described in Lello et al. [67, 68]. Several other disease conditions  
 82 were trained using the PRS-CS package [69, 70] and the EUR 1000 Genomes reference panel  
 83 coupled with a publicly available GWAS. For these traits, GWAS were selected that specifically  
 84 excluded the UK Biobank participants in the GWAS to prevent inflated performance metrics.  
 85 The GWAS were pruned by filtering down to markers which are present in the UK Biobank  
 86 calls before running PRS-CS with the 1000 Genomes EUR LD panels. In addition to LASSO

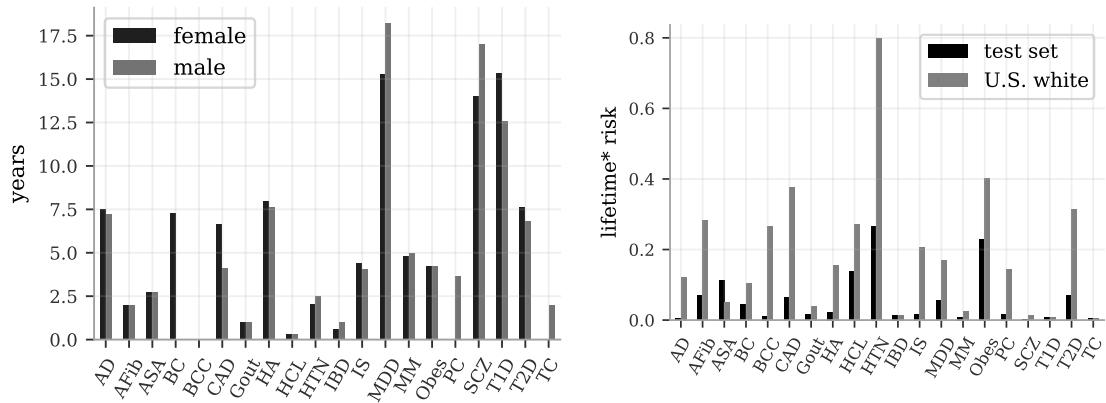

**Figure 2:** The weights  $l_d$ , average number of life years lost due to the disease, and the lifetime\* risks  $\rho_d$  used to construct the index. **Left:** The weights  $l_d$  in the main text equation (1) are estimates of life years lost due to having a disease as compared to the general population lifespan, as deduced from literature studies [1–66]. **Right:** The lifetime disease risks for the UKB data compared to the U.S. general white population. The UKB numbers are the lifetime prevalence up to data collection are hence underestimates. The risks were averaged over the sexes except for BC, PC and TC. We used the values for the white U.S. population in the index construction in main text equation (1). The ratio between UKB and U.S. risks are also shown to the right in **Figure 1**

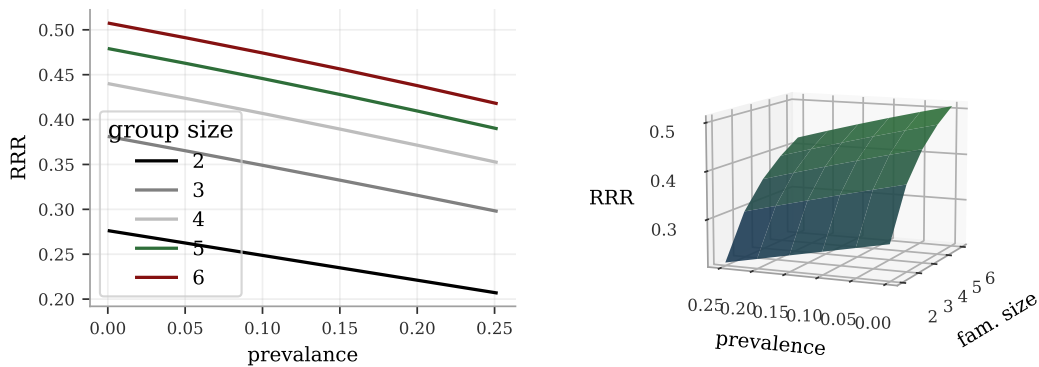

**Figure 3:** The RRR for selection experiments depend on the prevalence in the population. The RRR for selecting on a single predictor can be calculated theoretically using the Gaussian risk model. The metric varies with disease prevalence with lower RRR for more common diseases. This example used the fairly typical AUC of .64.

87 and PRS-CS, we used a publicly available schizophrenia predictor which was then filtered to  
88 markers which overlap the UK Biobank imputed set and filtered for p-value  $< 0.05$  resulting  
89 in 24,387 markers. We now list the construction methods and data sources for each predictor  
90 along with the AUC on the testing set described in 1.2.

91 **Alzheimer’s Disease** GWAS [71] + PRS-CS [69, 70] - 21,982 European ancestry cases,  
92 41,944 European ancestry controls; retrieved from [72]. AUC:  $.686 \pm .004$

93 **Asthma** UK Biobank LASSO [67, 68] - trained on 48,875 cases, 369,158 controls. Hyperpa-  
94 rameter selection on 500 cases and 500 controls. AUC:  $.626 \pm .004$

95 **Atrial fibrillation** UK Biobank LASSO [67, 68] - trained on 29,206 cases, 388,670 controls.  
96 Hyperparameter selection on 500 cases and 500 controls. AUC:  $.623 \pm .004$

97 **Basal cell carcinoma** UK Biobank LASSO [67, 68] - trained on 3,795 cases, 414,238 con-  
98 trols. Hyperparameter selection on 500 cases and 500 controls. AUC:  $.618 \pm .011$

99 **Breast cancer** UK Biobank LASSO [67, 68] - trained on 9,459 cases, 216,339 controls. Hy-  
100 perparameter selection on 100 cases and 100 controls. AUC:  $.594 \pm .008$

101 **Coronary artery disease** UK Biobank LASSO [67, 68] - trained on 27,172 cases, 390,704  
102 controls. Hyperparameter selection on 500 cases and 500 controls. AUC:  $.616 \pm .005$

103 **Diabetes type I** UK Biobank LASSO [67, 68] - trained on 2,345 cases, 415,688 controls.  
104 Hyperparameter selection on 500 cases and 500 controls. AUC:  $.627 \pm .015$

105 **Diabetes type II** UK Biobank LASSO [67, 68] - trained on 18,097 cases, 399,936 controls.  
106 Hyperparameter selection on 500 cases and 500 controls. AUC:  $.616 \pm .004$

107 **Gout** UK Biobank LASSO [67, 68] - trained on 5,712 cases, 412,321 controls. Hyperparam-  
108 eter selection on 500 cases and 500 controls. AUC:  $.654 \pm .011$

109 **Heart attack** UK Biobank LASSO [67, 68] - trained on 9,455 cases, 408,578 controls. Hy-  
110 perparameter selection on 500 cases and 500 controls. AUC:  $.580 \pm .008$

111 **Hypercholesterolemia** UK Biobank LASSO [67, 68] - trained on 53,603 cases, 364,430  
112 controls. Hyperparameter selection on 500 cases and 500 controls. AUC:  $.616 \pm .003$

113 **Hypertension** UK Biobank LASSO [67, 68] - trained on 110,893 cases, 307,140 controls.  
114 Hyperparameter selection on 500 cases and 500 controls. AUC:  $.635 \pm .003$

115 **Inflammatory bowel disease** GWAS [73] + PRS-CS [69, 70] - 12k cases + 21k controls -  
116 retrieved from [74]. AUC:  $.647 \pm .003$

117 **Ischemic stroke** GWAS [75] + PRS-CS [69, 70] - 67,162 cases and 454,450 controls, retrieved  
118 from [76]. AUC:  $.541 \pm .002$

119 **Major depressive disorder** GWAS [77] + PRS-CS [69, 70] - 45,396 cases and 97,250 con-  
120 trols - retrieved `daner_PGC_MDD_noUKB_no23andMe.txt` from [78]. AUC:  $.534 \pm .001$

121 **Malignant melanoma** UK Biobank LASSO [67, 68] - trained on 2,911 cases, 415,122 con-  
122 trols. Hyperparameter selection on 500 cases and 500 controls. AUC:  $.573 \pm .016$

123 **Obesity** UK Biobank LASSO [67, 68] - trained on 417,687 continuous measurements from  
124 field 2100 with 1,000 used for hyperparameter selection. Predictor then evaluated on  
125 the test set using the Obesity definition. AUC:  $.669 \pm .002$

126 **Prostate cancer** UK Biobank LASSO [67, 68] - trained on 3,275 cases, 189,560 controls.  
127 Hyperparameter selection on 100 cases and 100 controls. AUC:  $.636 \pm .015$

128 **Schizophrenia** The schizophrenia predictor was obtained using the results from [79]. Re-  
129 trieved the file `scz2.prs.txt.gz` from [80]. The predictor was filtered to SNPs which  
130 overlap the UKB imputed set and filtered for p-value  $< 0.05$  resulting in 24,387 SNPs.  
131 The beta value was calculated as the  $\log(\text{OR})$ . AUC:  $.673 \pm .029$

132 **Testicular cancer** UK Biobank LASSO [67, 68] - trained on 650 cases, 192,185 controls.  
133 Hyperparameter selection on 100 cases and 100 controls. AUC:  $.612 \pm .041$

## 134 2.2 AUC evaluation

135 The uncertainties in AUC for each predictor in **Table 1** in the main text were computed via  
136 the following algorithm. Case/control numbers and mean PRS were computed in the test set  
137 and a theoretical PRS-distribution was defined, according to equation (2) in the main text.  
138 The same numbers of cases and controls that were in the test set were sampled from the case  
139 and control parts of the PRS-distribution, respectively. An AUC was computed based on the  
140 sampled PRS and the procedure was repeated 30 times. The standard deviation from these  
141 repeated computations is the error reported next to the AUC.

## 142 3 Additional Selection Experiments

### 143 3.1 Selection experiments in genetic trios

144 The full RRR and index gain plots for the index selection among genetic trios are shown in  
145 **Figure 4**. Note that the error bars are very large and most disease RRR and index gains are  
146 inconclusive in this experiment. We also display a comparison of total index gain in DALY  
147 for pairs and trios of both siblings and unrelated individuals in **Figure 5**.

### 148 3.2 Sex bias adjusted health index

149 The index is defined with sex specific parameters  $l_d$  and  $\rho_d$  and includes different diseases for  
150 males (PC, TC) and females (BC). Consequently, the health index distributions are somewhat  
151 different for the two sexes. The effect is small but existant, as can be seen in **Figure 6**. The  
152 selection experiments are sensitive to this and the larger the group size the stronger is the  
153 dependence on the right tails, i.e., on the distribution differences for the highest health index  
154 values. As can be seen to the left in the figure, there is a larger proportion of females than  
155 males in the test set with very high health index as compared to the intermediate or lower  
156 index value regions. This is a result of the particular choice of index and test set but comports  
157 well in both direction and scale of general life expectancy differences. As a result, however,  
158 direct selection on the health index leads to an over-representation of women in the selected  
159 set. We defined a minimal non-linear transformation of the male and female health index

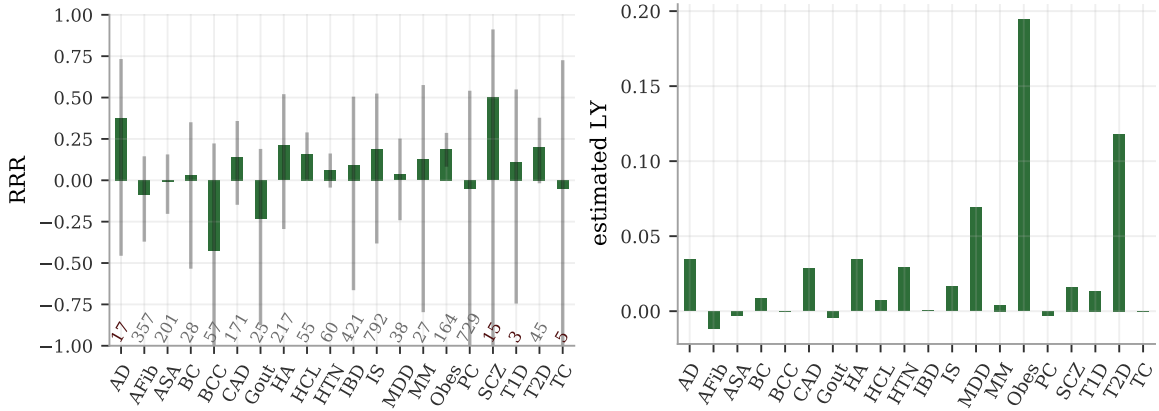

**Figure 4: Index selection between 969 trios of genetic siblings.** **Left:** The RRR result is inconclusive for most diseases, as is seen by the theoretical error bars (using 95% C.I. from Wilson score interval applied to the selected prevalences); the figure is cropped at  $RRR = \pm 1$ . The small sample size of trios is enough only to statistically determine non-zero RRR for HCL and Obes, while HTN and T2D borders to significance. All these are positive. **Right:** The index gain from the selection among the trios shows no strong negative components. No error bars were computed but the uncertainties are naturally very large for the trios also in this metric.

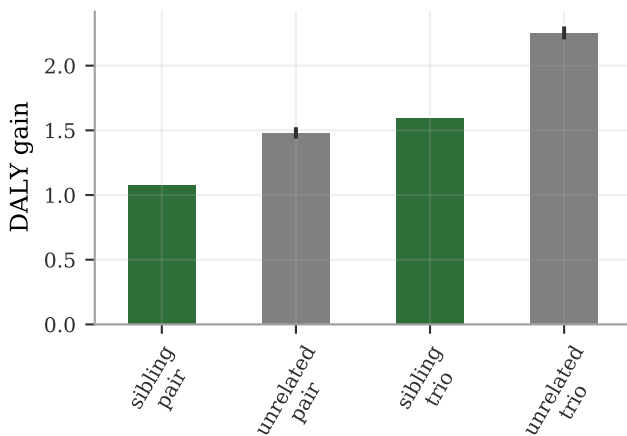

**Figure 5: Index gain in DALY from selection among pairs and trios of siblings and unrelated individuals.** Selection among siblings retains most of the gain for both sibling pairs and trios, as compared to selection among unrelated individuals. The sibling/unrelated ratios are .73 and .71 for pairs and trios, respectively. The error bars for the unrelated individuals are 95% C.I. estimates from 25 selection experiments. No error bars were computed for the sibling results but the uncertainties are larger than for the selection among unrelated individuals.

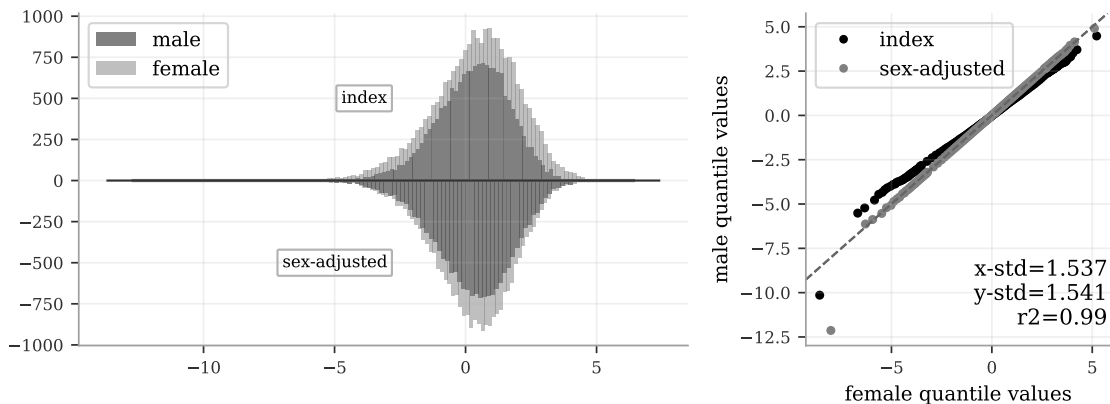

**Figure 6: The health index histograms for males and females, before and after sex-adjustment.** **Left:** The health index histograms for females and males are plotted on the positive y-axis, while the sex-adjusted histograms are plotted on the negative axis. There were more females (23,110) in the test set than males (16,803). The adjustment is minor but with noticeable effect on the tails; the corresponding densities (normalizing by total number of females/males) are practically identical after the sex adjustment. **Right:** A QQ-plot of the female and male health index distributions before and after sex-adjustment. The plotted dots correspond to percentiles but with extra focus on the tails; the 0-3 percentiles and 97-100 percentiles are split into 40 equidistant points each such that the tail behaviors are shown clearly. The sex-adjusted distributions agree almost exactly, with a regression  $R^2$  of 0.99 (affected only by the extreme outlier at 0.075th percentile). As such, a sex adjusted health index could therefore be used to compare the health of males to females without preference to either, as both are measured relative to their respective cohorts.

160 values mapping them to their mean distribution for a sex neutral health index. The result is  
 161 plotted on the negative y-axis in **Figure 6**, with the resulting QQ-plot to the right. Selecting  
 162 on the sex-adjusted index kept the females-to-males ratio among the selected equal to the  
 163 total test set ratio. This had minor measurable effects on the index performance and the  
 164 results for group size five are shown in **Figure 7**.

### 165 3.3 Non-European ancestry

166 The main part of this paper dealt exclusively with a data set of European ancestry. All  
 167 predictors were trained on such a cohort and it is a well-established fact that predictor per-  
 168 formance declines with the genetic distance between two populations (typically linearly when  
 169 measured in  $R^2$ , see for example [81]). Nevertheless, some of the performance of the Euro-  
 170 trained predictors is retained when applied to other ancestries and we demonstrate here that  
 171 even a composite health index has non-trivial performance for people of South Asian (SAS),  
 172 East Asian (EAS), and African (AFR) ancestry. Based on self-reported ancestry in UKB, we  
 173 created test sets with 9,438 (SAS), 1,493 (EAS), and 7,614 (AFR) samples, withheld from all  
 174 training and hyperparameter tuning.

175 We used the same type of index construction but excluded basal cell carcinoma and ma-  
 176 lignant melanoma because these are close to non-existent diseases in these test sets and major  
 177 depressive disorder because its poor individual predictor performance.

178 For each test set, we used ancestry specific weights and population risks  $l_d, \rho_d$ . The  
 179 individual disease RRR and index component gains for SAS are shown in **Figure 8** for selection



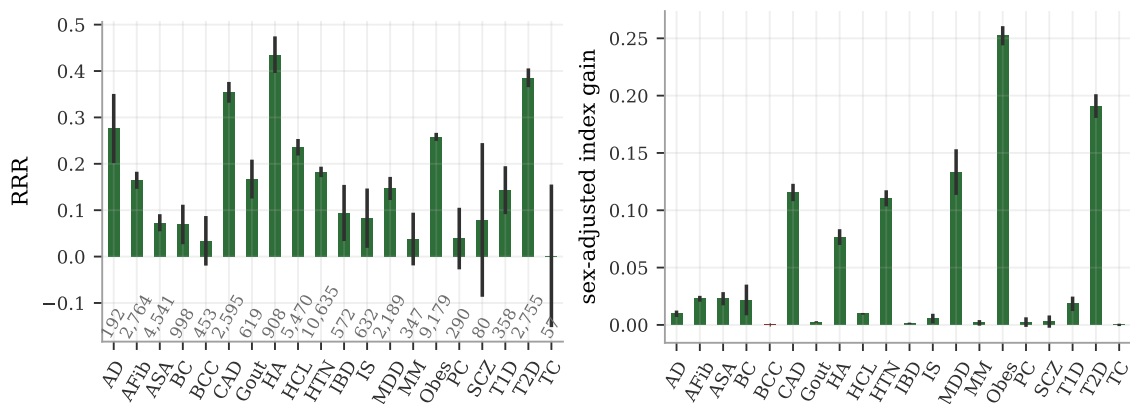

**Figure 7: The RRR and index gain for selection on the sex-adjusted health index for group size of five. Left:** The RRR values are generally similar when selecting on the sex-adjusted health index. As in the main document, the case numbers are listed just above the x-axis. The error bars are 95% C.I. estimates from 25 selection experiments. **Right:** The index gain is also just slightly affected with no qualitative differences. Since the sex-adjustment is a non-linear transformation, it is no longer technically possible to interpret the gain in life years. The error bars are again bootstrap estimates of the 95% C.I. from 25 selection experiments.

180 among groups of size 5, while the total index gains are shown for EAS and AFR in **Figure**  
 181 **9**. The RRR result is overwhelmingly positive also for South Asian ancestry, again reaching  
 182 over or about 40% for a couple of traits (AD, HA). Notably, the Alzheimer’s disease risk was  
 183 reduced more for SAS than EUR in these experiments even taking the large error bars into  
 184 account. This is based on only 34 SAS AD cases, however. The case numbers are always  
 185 included above the x-axis in the plots for this reason. Another observation is the differences  
 186 in type II diabetes. Although still with a strong relative risk reduction of 18%, the SAS result  
 187 is about half the RRR of the EUR index. The SAS RRR for IBD is also worse and appears to  
 188 have a borderline statistically significant negative mean value. As seen in **Figure 10** below, the  
 189 IBD predictor trained in EUR has more negative pairwise correlations with other disease PRS  
 190 when applied to SAS. In particular BC, SCZ, T1D and T2D, with their much stronger index  
 191 weights, may counter the predicted IBD risk for SAS. To be clear, the PRS correlations in the  
 192 SAS data sets still refer to the predictors trained in the EUR data set and the differences may  
 193 be due to distinct linkage disequilibrium patterns in general; it is still unknown what the PRS  
 194 correlations would be using a training set of SAS ancestry. Lastly, we note that MDD still  
 195 has a significant positive RRR despite the fact that there was no direct MDD PRS included  
 196 in the South Asian health index.

197 The SAS index gains for the components are overwhelmingly positive and dominated by  
 198 CAD, heart attack, hypertension, major depressive disorder, obesity, and type II diabetes.  
 199 Again, we note that MDD is contributing a lot — due to its high prevalence and strong  
 200 impact — despite not being in the index directly. There was no statistically significant  
 201 negative contributions to the SAS index.

202 The index gain from selection among EAS and AFR also performs well, as seen in **Figure**  
 203 **9**. We detect a measurable attenuation from the EUR result, as is expected due to the genetic  
 204 distance from the European training population. Yet, there is a consistent and strongly  
 205 significant positive gain for both EAS and AFR when using the EUR-trained predictors and

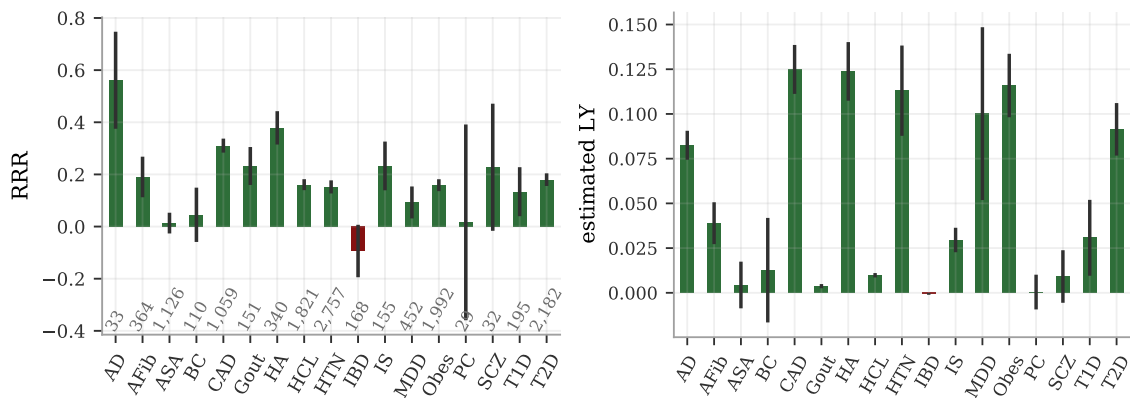

**Figure 8: The RRR and index gain for selection on a South Asian health index among unrelated groups of size five.** In both figures, the error bars are 95% C.I. estimates from 25 selection experiments. **Left:** The RRR from the index selection is overwhelmingly positive also in the SAS test set. The borderline statistically significant negative RRR for IBD is the most notable difference from the EUR result and can be traced to IBD’s more negative PRS-correlations with other predictors in SAS as compared to EUR (see **Figure 10**). Note again that the PRS is computed by the EUR trained predictor applied to SAS and may reflect population differences in linkage disequilibrium rather than underlying biology in SAS. **Right:** The component-wise index gain is also predominantly positive. The possibly negative RRR for IBD has almost no impact at all on the index due to its small weight and low prevalence.

206 ancestry specific parameters in the index construction.

207 The phenotypic and genetic correlation characterization of the diseases and predictors in  
 208 the South Asian test set is shown in **Figure 10**.

## 209 References

- 210 1. Albertson, P. C. Long-term Survival Among Men With Conservatively Treated Localized  
 211 Prostate Cancer. *JAMA: The Journal of the American Medical Association* **274**, 626  
 212 (Aug. 1995) (cit. on p. 4).
- 213 2. Alcocer, L. & Cueto, L. Hypertension, a health economics perspective. *Therapeutic Ad-*  
 214 *vances in Cardiovascular Disease* **2**, 147–155 (June 2008) (cit. on p. 4).
- 215 3. Berry, J. D. *et al.* Lifetime risks of cardiovascular disease. *New England Journal of*  
 216 *Medicine* **366**, 321–329 (Jan. 2012) (cit. on p. 4).
- 217 4. Botta, L. *et al.* Changes in life expectancy for cancer patients over time since diagnosis.  
 218 *Journal of Advanced Research* **20**, 153–159 (Nov. 2019) (cit. on p. 4).
- 219 5. Bucholz, E. M. *et al.* Life expectancy and years of potential life lost after acute myocardial  
 220 infarction by sex and race: a cohort-based study of Medicare beneficiaries. *Journal of*  
 221 *the American College of Cardiology* **66**, 645–655 (Aug. 2015) (cit. on p. 4).
- 222 6. Bucholz, E. M., Ma, S., Normand, S.-L. T. & Krumholz, H. M. Race, Socioeconomic Sta-  
 223 tus, and Life Expectancy After Acute Myocardial Infarction. *Circulation* **132**, 1338–1346  
 224 (Oct. 2015) (cit. on p. 4).

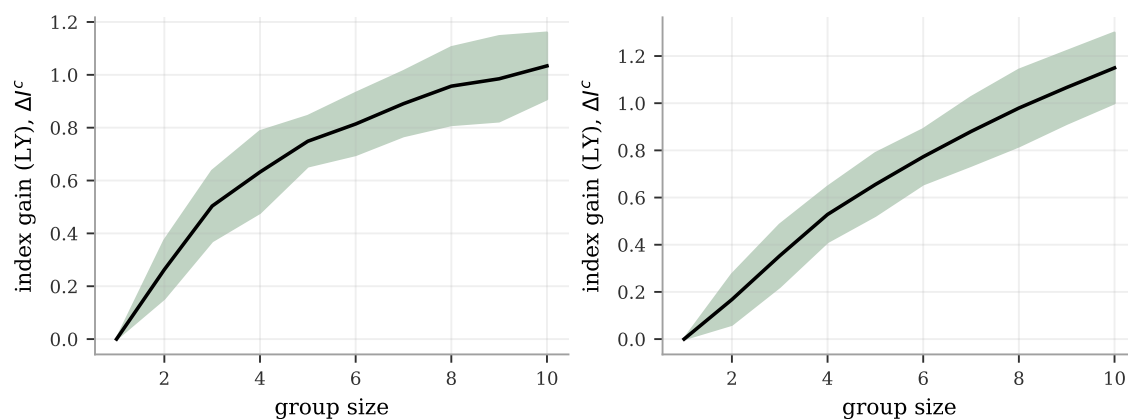

**Figure 9: Index gain from selection experiments as function of group size when the index are applied to East Asian and African test sets.** The selection was done on indices using EUR-trained predictors (excluding BCC, MM, and MDD) but ancestry specific lifetime risks  $\rho_d$  and lifespan impact weights  $l_d$ . Error bars are 95% C.I. as estimated from 25 separate experiments for each ancestry. **Left:** EAS using a test set of 1,493 samples. **Right:** AFR using a test set of 7,614 samples.

- 225 7. Burisch, J., Jess, T., Martinato, M. & Lakatos, P. The burden of inflammatory bowel  
226 disease in Europe. *Journal of Crohn's and Colitis* **7** (June 2013) (cit. on p. 4).
- 227 8. Carson, A. P. *et al.* Ethnic differences in hypertension incidence among middle-aged  
228 and older adults: the multi-ethnic study of atherosclerosis. *Hypertension* **57**, 1101–1107  
229 (June 2011) (cit. on p. 4).
- 230 9. Carstensen, B., Rønn, P. F. & Jørgensen, M. E. Lifetime risk and years lost to type 1  
231 and type 2 diabetes in Denmark, 1996–2016. *BMJ Open Diabetes Research & Care* **9**  
232 (June 2021) (cit. on p. 4).
- 233 10. Chang, C.-K. *et al.* Life Expectancy at Birth for People with Serious Mental Illness and  
234 Other Major Disorders from a Secondary Mental Health Care Case Register in London.  
235 *PLoS ONE* **6** (May 2011) (cit. on p. 4).
- 236 11. Chen, V. *et al.* Lifetime Risks for Hypertension by Contemporary Guidelines in African  
237 American and White Men and Women. *JAMA Cardiology* **4**, 455 (Mar. 2019) (cit. on  
238 p. 4).
- 239 12. Coleman, M. P. Opinion: why the variation in breast cancer survival in Europe? *Breast*  
240 *Cancer Research* **1** (Oct. 1999) (cit. on p. 4).
- 241 13. Concannon, P. *et al.* Type 1 Diabetes: Evidence for Susceptibility Loci from Four Genome-  
242 Wide Linkage Scans in 1, 435 Multiplex Families. *Diabetes* **54**, 2995–3001 (Oct. 2005)  
243 (cit. on p. 4).
- 244 14. Crump, C., Winkleby, M. A., Sundquist, K. & Sundquist, J. Comorbidities and Mortality  
245 in Persons With Schizophrenia: A Swedish National Cohort Study. *American Journal of*  
246 *Psychiatry* **170**, 324–333 (Mar. 2013) (cit. on p. 4).
- 247 15. Flohil, S. C. *et al.* Trends in Basal cell carcinoma incidence rates: a 37-year Dutch  
248 observational study. *Journal of Investigative Dermatology* **133**, 913–918 (Apr. 2013)  
249 (cit. on p. 4).

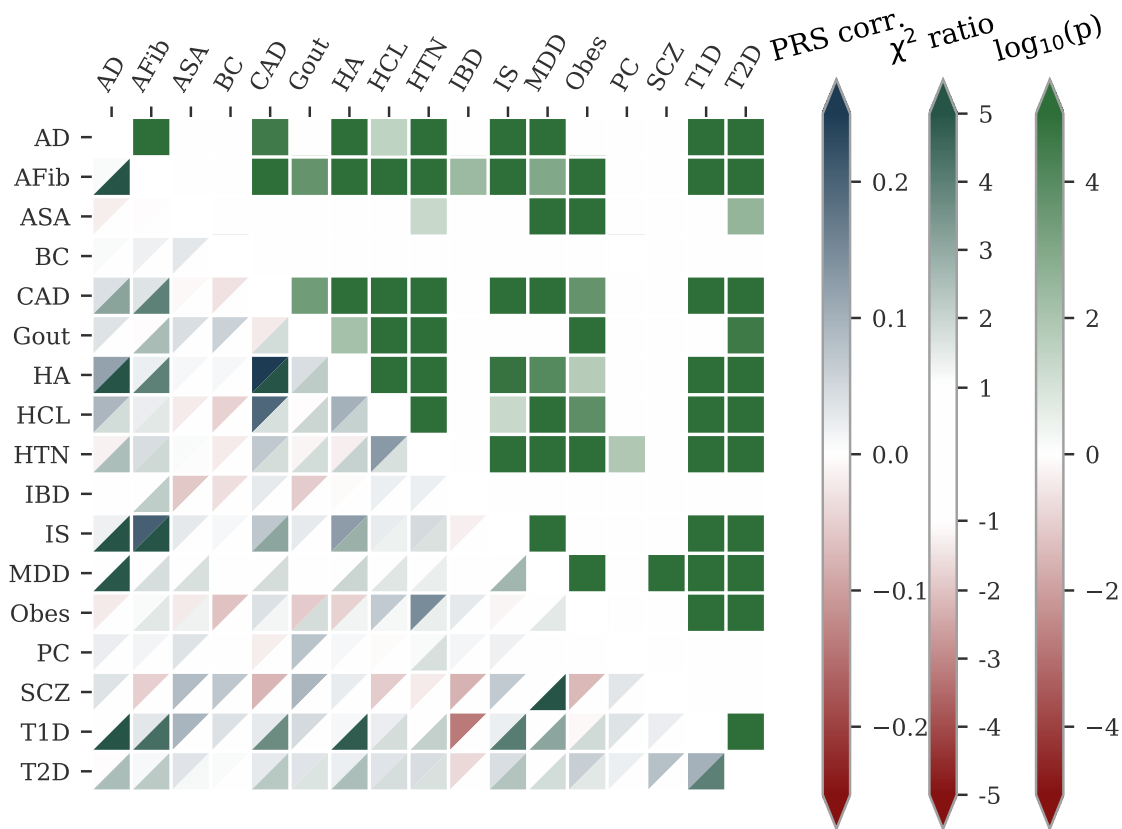

**Figure 10: PRS correlations and phenotypic comorbidities in the South Asian test set.** See the main text and **Figure 8** in the paper on how to interpret this figure. The qualitative observations for the EUR ancestry are true for the SAS test set too: the studied diseases tend overwhelmingly to have positive comorbidity with one or more of the other diseases and the PRS are mostly uncorrelated or mildly positive correlated. There are a few more weakly anti-correlated pairs for SAS than for EUR, in particular for schizophrenia and IBD. The latter provides an explanation to why IBD has a worse RRR for SAS than for EUR. This may be an artifact of using EUR trained predictors on SAS ancestry and does not need to reflect the underlying genetic effects and biology. An index built from SAS trained predictor could and will answer such questions as soon as sufficient data is available.

- 250 16. Franco, O. H., Peeters, A., Bonneux, L. & de Laet, C. Blood Pressure in Adulthood and  
 251 Life Expectancy With Cardiovascular Disease in Men and Women. *Hypertension* **46**,  
 252 280–286 (June 2005) (cit. on p. 4).
- 253 17. Gitsels, L. A., Kulinskaya, E. & Steel, N. Survival prospects after acute myocardial  
 254 infarction in the UK: a matched cohort study 1987-2011. *BMJ Open* **7** (Dec. 2017) (cit.  
 255 on p. 4).
- 256 18. Gregg, E. W. *et al.* Trends in lifetime risk and years of life lost due to diabetes in the  
 257 USA, 1985–2011: A modelling study. *The Lancet Diabetes & Endocrinology* **2**, 867–874  
 258 (2014) (cit. on p. 4).
- 259 19. Hjorthøj, C., Stürup, A. E., McGrath, J. J. & Nordentoft, M. years of potential life lost  
 260 and life expectancy in schizophrenia: a systematic review and meta-analysis. *The Lancet*  
 261 *Psychiatry* **4**, 295–301 (Feb. 2017) (cit. on p. 4).

- 262 20. Hogg, R. S., Schechter, M. T., Montaner, J. S. & Hogg, J. C. Asthma mortality in  
263 Canada, 1946 to 1990. *Canadian Respiratory Journal* **2**, 61–66 (1995) (cit. on p. 4).
- 264 21. Hruby, A. & Hu, F. B. The Epidemiology of Obesity: A Big Picture. *Pharmacoeconomics*  
265 **33**, 673–689 (July 2014) (cit. on p. 4).
- 266 22. Hung, M.-C., Ekwueme, D. U., Rim, S. H. & White, A. Racial/ethnicity disparities  
267 in invasive breast cancer among younger and older women: An analysis using multiple  
268 measures of population health. *Cancer Epidemiology* **45**, 112–118 (Oct. 2016) (cit. on  
269 p. 4).
- 270 23. Hutchinson, G *et al.* Morbid Risk of Schizophrenia in First-Degree Relatives of White  
271 and African-Caribbean Patients with Psychosis. *British Journal of Psychiatry* **169**, 776–  
272 780 (Jan. 1996) (cit. on p. 4).
- 273 24. Karjalainen, S., Salo, H. & Teppo, L. Basal Cell and Squamous Cell Carcinoma of the  
274 Skin in Finland. *International Journal of Dermatology* **28**, 445–450 (Sept. 1989) (cit. on  
275 p. 4).
- 276 25. Kassai, B., Boissel, J.-P., Cucherat, M., Boutitie, F. & Gueyffier, F. Treatment of High  
277 Blood Pressure and Gain in Event-Free Life Expectancy. *Vascular Health and Risk Man-*  
278 *agement* **1**, 163–169 (June 2005) (cit. on p. 4).
- 279 26. Katzmarzyk, P. T. & Staiano, A. E. New race and ethnicity standards: Elucidating  
280 health disparities in diabetes. *BMC Medicine* **10** (Apr. 2012) (cit. on p. 4).
- 281 27. Kendler, K. S. The Roscommon Family Study: I. Methods, Diagnosis of Probands, and  
282 Risk of Schizophrenia in Relatives. *Archives of General Psychiatry* **50**, 527 (July 1993)  
283 (cit. on p. 4).
- 284 28. Kharazmi, E. *et al.* Cancer Risk in Relatives of Testicular Cancer Patients by Histology  
285 Type and Age at Diagnosis: A Joint Study from Five Nordic Countries. *European Urology*  
286 **68**, 283–289 (Aug. 2015) (cit. on p. 4).
- 287 29. Kirchgessner, J. *et al.* Impact on Life Expectancy of Withdrawing Thiopurines in Patients  
288 with Crohn’s Disease in Sustained Clinical Remission: A Lifetime Risk-Benefit Analysis.  
289 *PLOS ONE* **11** (June 2016) (cit. on p. 4).
- 290 30. Kolomisky-Rabas, P. L. *et al.* Lifetime Cost of Ischemic Stroke in Germany: Results and  
291 National Projections From a Population-Based Stroke Registry. *Stroke* **37**, 1179–1183  
292 (Mar. 2006) (cit. on p. 4).
- 293 31. Kuenzig, E. M., Manuel, D. G., Donelle, J. & Benchimol, E. I. Life expectancy and  
294 health-adjusted life expectancy in people with inflammatory bowel disease. *Canadian*  
295 *Medical Association Journal* **192** (2020), month=11) (cit. on p. 4).
- 296 32. Kurian, A. W., Fish, K., Shema, S. J. & Clarke, C. A. Lifetime risks of specific breast  
297 cancer subtypes among women in four racial/ethnic groups. *Breast Cancer Research* **12**  
298 (Nov. 2010) (cit. on p. 4).
- 299 33. Lange, P., Çolak, Y., Ingebrigtsen, T. S., Vestbo, J. & Marott, J. L. Long-term prognosis  
300 of asthma, chronic obstructive pulmonary disease, and asthma-chronic obstructive pul-  
301 monary disease overlap in the Copenhagen City Heart study: a prospective population-  
302 based analysis. *The Lancet Respiratory Medicine* **4**, 454–462 (Apr. 2016) (cit. on p. 4).

- 303 34. Larson, E. B. *et al.* Survival after Initial Diagnosis of Alzheimer Disease. *Annals of*  
304 *Internal Medicine* **140**, 501 (Apr. 2004) (cit. on p. 4).
- 305 35. Laursen, T. M. Life expectancy among persons with schizophrenia or bipolar affective  
306 disorder. *Schizophrenia Research* **131**, 101–104 (Sept. 2011) (cit. on p. 4).
- 307 36. Laursen, T. M., Musliner, K. L., Benros, M. E., Vestergaard, M. & Munk-Olsen, T.  
308 Mortality and life expectancy in persons with severe unipolar depression. *Journal of*  
309 *Affective Disorders* **193**, 203–207 (Mar. 2016) (cit. on p. 4).
- 310 37. Leening, M. J. *et al.* Sex differences in lifetime risk and first manifestation of cardiovas-  
311 cular disease: prospective population based cohort study. *BMJ* **349** (Nov. 2014) (cit. on  
312 p. 4).
- 313 38. Livingstone, S. J. *et al.* Estimated Life Expectancy in a Scottish Cohort With Type 1  
314 Diabetes, 2008-2010. *JAMA* **313**, 37 (Jan. 2015) (cit. on p. 4).
- 315 39. Lloyd-Jones, D. M., Larson, M. G., Beiser, A. & Levy, D. Lifetime risk of developing  
316 coronary heart disease. *The Lancet* **353**, 89–92 (Jan. 1999) (cit. on p. 4).
- 317 40. Lloyd-Jones, D. M. *et al.* Lifetime Risk for Developing Congestive Heart Failure: The  
318 Framingham Heart Study. *Circulation* **106**, 3068–3072 (Dec. 2002) (cit. on p. 4).
- 319 41. Lloyd-Jones, D. M. *et al.* Prediction of Lifetime Risk for Cardiovascular Disease by Risk  
320 Factor Burden at 50 Years of Age. *Circulation* **113**, 791–798 (Feb. 2006) (cit. on p. 4).
- 321 42. Lloyd, T. *et al.* Lifetime risk of being diagnosed with, or dying from, prostate cancer by  
322 major ethnic group in England 2008-2010. *BMC Medicine* **13** (July 2015) (cit. on p. 4).
- 323 43. Lobo, A *et al.* Incidence and lifetime risk of dementia and Alzheimer’s disease in a South-  
324 ern European population. *Acta Psychiatrica Scandinavica* **124**, 372–383 (Aug. 2011) (cit.  
325 on p. 4).
- 326 44. Mirabelli, M. C., Beavers, S. F., Chatterjee, A. B. & Moorman, J. E. Age at asthma  
327 onset and subsequent asthma outcomes among adults with active asthma. *Respiratory*  
328 *Medicine* **107**, 1829–1836 (Dec. 2013) (cit. on p. 4).
- 329 45. Morgan, C. L., Currie, C. J. & Peters, J. R. Relationship between diabetes and mortality:  
330 a population study using record linkage. *Diabetes Care* **23**, 1103–1107 (Aug. 2000) (cit.  
331 on p. 4).
- 332 46. Mou, L. *et al.* Lifetime Risk of Atrial Fibrillation by Race and Socioeconomic Status.  
333 *Circulation: Arrhythmia and Electrophysiology* **11** (July 2018) (cit. on p. 4).
- 334 47. Narayan, K. M., Boyle, J. P., Thompson, T. J., Sorensen, S. W. & Williamson, D. F.  
335 Lifetime risk for diabetes mellitus in the United States. *JAMA* **290**, 1884 (Oct. 2003)  
336 (cit. on p. 4).
- 337 48. Pedersen, C. B. *et al.* A Comprehensive Nationwide Study of the Incidence Rate and  
338 Lifetime Risk for Treated Mental Disorder. *JAMA Psychiatry* **71**, 573 (May 2014) (cit.  
339 on p. 4).
- 340 49. Collaboration, P. S. Body-mass index and cause-specific mortality in 900 000 adults:  
341 collaborative analyses of 57 prospective studies. *The Lancet* **373**, 1083–1096 (Mar. 2009)  
342 (cit. on p. 4).

- 343 50. Rawshani, A. *et al.* Excess mortality and cardiovascular disease in type 1 diabetes in  
344 relation to age at onset: a nationwide study of 27, 195 young adults with diabetes. *The*  
345 *Lancet* **392**, 477–486 (Aug. 2018) (cit. on p. 4).
- 346 51. Redondo, M. J. Genetics of type 1A diabetes. *Recent Progress in Hormone Research* **56**,  
347 69–90 (Jan. 2001) (cit. on p. 4).
- 348 52. Salama, A. K. *et al.* The Effect of Metastatic Site and Decade of Diagnosis on the  
349 Individual Burden of Metastatic Melanoma: Contemporary Estimates of Average Years  
350 of Life Lost. *Cancer Investigation* **30**, 637–641 (Sept. 2012) (cit. on p. 4).
- 351 53. Seshadri, S. & Wolf, P. A. Lifetime risk of stroke and dementia: current concepts, and  
352 estimates from the Framingham Study. *The Lancet Neurology* **6**, 1106–1114 (Dec. 2007)  
353 (cit. on p. 4).
- 354 54. Smith, A. J., Lambert, P. C. & Rutherford, M. J. Understanding the impact of sex  
355 and stage differences on melanoma cancer patient survival: a SEER-based study. *British*  
356 *Journal of Cancer* **124**, 671–677 (Nov. 2020) (cit. on p. 4).
- 357 55. Staerk, L. *et al.* Lifetime risk of atrial fibrillation according to optimal, borderline, or  
358 elevated levels of risk factors: cohort study based on longitudinal data from the Fram-  
359 ingham Heart Study. *BMJ* **361** (Apr. 2018) (cit. on p. 4).
- 360 56. Steensma, C *et al.* Describing the population health burden of depression: health-adjusted  
361 life expectancy by depression status in Canada. *Health Promotion and Chronic Disease*  
362 *Prevention in Canada* **36**, 205–213 (Oct. 2016) (cit. on p. 4).
- 363 57. Sullivan, P. F., Neale, M. C. & Kendler, K. S. Genetic epidemiology of major depression:  
364 review and meta-analysis. *American Journal of Psychiatry* **157**, 1552–1562 (Oct. 2000)  
365 (cit. on p. 4).
- 366 58. Syriopoulou, E., Bower, H., Andersson, T. M.-L., Lambert, P. C. & Rutherford, M. J.  
367 Estimating the impact of a cancer diagnosis on life expectancy by socio-economic group  
368 for a range of cancer types in England. *British Journal of Cancer* **117**, 1419–1426 (Oct.  
369 2017) (cit. on p. 4).
- 370 59. Thiam, A., Zhao, Z., Quinn, C. & Barber, B. Years of life lost due to metastatic  
371 melanoma in 12 countries. *Journal of Medical Economics* **19**, 259–264 (Oct. 2015) (cit.  
372 on p. 4).
- 373 60. To, T., Wang, C., Guan, J., McLimont, S. & Gershon, A. S. What Is the Lifetime Risk  
374 of Physician-diagnosed Asthma in Ontario, Canada? *American Journal of Respiratory*  
375 *and Critical Care Medicine* **181**, 337–343 (2010) (cit. on p. 4).
- 376 61. Tsevat, J, Weinstein, M. C., Williams, L. W., Tosteson, A. N. & Goldman, L. Expected  
377 gains in life expectancy from various coronary heart disease risk factor modifications.  
378 *Circulation* **83**, 1194–1201 (Dec. 1991) (cit. on p. 4).
- 379 62. Vasan, R. S., Pencina, M. J., Cobain, M., Freiberg, M. S. & D’Agostino, R. B. Esti-  
380 mated Risks for Developing Obesity in the Framingham Heart Study. *Annals of Internal*  
381 *Medicine* **143**, 473 (Oct. 2005) (cit. on p. 4).
- 382 63. Vinter, N. *et al.* Trends in excess mortality associated with atrial fibrillation over 45  
383 years (Framingham Heart Study): community based cohort study. *BMJ* **370**, m2724  
384 (Aug. 2020) (cit. on p. 4).

- 385 64. Wong, C. S., Strange, R. C. & T, L. J. Basal cell carcinoma. *BMJ* **327**, 794–798 (Oct.  
386 2003) (cit. on p. 4).
- 387 65. Wright, A. K. *et al.* Life Expectancy and Cause-Specific Mortality in Type 2 Diabetes:  
388 A Population-Based Cohort Study Quantifying Relationships in Ethnic Subgroups. *Di-*  
389 *abetes Care* **40**, 338–345 (Dec. 2016) (cit. on p. 4).
- 390 66. Zanetti, O, Solerte, S. B. & Cantoni, F. Life expectancy in alzheimer’s disease (AD).  
391 *Archives of Gerontology and Geriatrics* **49**, 237–243 (2009) (cit. on p. 4).
- 392 67. Lello, L. *et al.* Accurate genomic prediction of human height. *Genetics* **210**. [PMC6216598],  
393 477–497 (2018) (cit. on pp. 3, 5, 6).
- 394 68. Lello, L., Raben, T. G., Yong, S. Y., Tellier, L. C. & Hsu, S. D. H. Genomic prediction  
395 of 16 complex disease risks including heart attack, diabetes, breast and prostate cancer.  
396 *Sci Rep* **9**. [PMC6814833], 1–16 (2019) (cit. on pp. 3, 5, 6).
- 397 69. Ge, T., Chen, C.-Y., Ni, Y., Feng, Y.-C. A. & Smoller, J. W. Polygenic prediction via  
398 Bayesian regression and continuous shrinkage priors. *Nature communications* **10**, 1–10  
399 (2019) (cit. on pp. 3, 5).
- 400 70. *PRSCs GitHub repository* <https://github.com/getian107/PRSCs>. Accessed: 2022-Feb-  
401 22 (cit. on pp. 3, 5).
- 402 71. Kunkle, B., Grenier-Boley, B. & Sims, R. e. a. Genetic meta-analysis of diagnosed  
403 Alzheimer’s disease identifies new risk loci and implicates A $\beta$ , tau, immunity and lipid  
404 processing. *Nature Genetics* **51**, 414–430. <https://www.nature.com/articles/s41588-019-0358-2> (2019) (cit. on p. 5).
- 406 72. *Downloadable Alzheimer’s predictor* [http://ftp.ebi.ac.uk/pub/databases/gwas/  
407 summary\\_statistics/GCST007001-GCST008000/GCST007511/Kunkle\\_etal\\_Stage1\\_  
408 results.txt](http://ftp.ebi.ac.uk/pub/databases/gwas/summary_statistics/GCST007001-GCST008000/GCST007511/Kunkle_etal_Stage1_results.txt). Accessed: 2022-05-30 (cit. on p. 5).
- 409 73. Liu, J., van Sommeren, S. & Huang, H. e. a. Association analyses identify 38 suscepti-  
410 bility loci for inflammatory bowel disease and highlight shared genetic risk across pop-  
411 ulations. *Nature Genetics* **47**, 979–986. <https://www.nature.com/articles/ng.3359>  
412 (2015) (cit. on p. 5).
- 413 74. *Downloadable inflammatory bowel disease predictor* [http://ftp.ebi.ac.uk/pub/  
414 databases/gwas/summary\\_statistics/GCST003001-GCST004000/GCST003043/IBD\\_  
415 trans\\_ethnic\\_association\\_summ\\_stats\\_b37.txt.gz](http://ftp.ebi.ac.uk/pub/databases/gwas/summary_statistics/GCST003001-GCST004000/GCST003043/IBD_trans_ethnic_association_summ_stats_b37.txt.gz). Accessed: 2022-05-30 (cit. on  
416 p. 5).
- 417 75. Malik, R., Chauhan, G. & Traylor, M. e. a. Multiancestry genome-wide association study  
418 of 520,000 subjects identifies 32 loci associated with stroke and stroke subtypes. *Nature*  
419 *Genetics* **50**, 524–537. <https://www.nature.com/articles/s41588-018-0058-3>  
420 (2018) (cit. on p. 5).
- 421 76. *Downloadable stroke predictor* [http://ftp.ebi.ac.uk/pub/databases/gwas/  
422 summary\\_statistics/GCST006001-GCST007000/GCST006908/harmonised/29531354-  
423 GCST006908-HP\\_0002140.h.tsv.gz](http://ftp.ebi.ac.uk/pub/databases/gwas/summary_statistics/GCST006001-GCST007000/GCST006908/harmonised/29531354-GCST006908-HP_0002140.h.tsv.gz). Accessed: 2022-05-30 (cit. on p. 5).



- 424 77. Wray, N., Ripke, S. & Mattheisen, M. e. a. Genome-wide association analyses identify  
425 44 risk variants and refine the genetic architecture of major depression. *Nature Genetics*  
426 **50**, 668–681. <https://www.nature.com/articles/s41588-018-0090-3> (2018) (cit. on  
427 p. 5).
- 428 78. *Downloadable major depressive disorder predictor* [https://www.med.unc.edu/pgc/  
429 download-results/mdd/](https://www.med.unc.edu/pgc/download-results/mdd/). Accessed: 2022-05-30 (cit. on p. 5).
- 430 79. Of the Psychiatric Genomics Consortium, S. W. G. Biological insights from 108 schizophrenia-  
431 associated genetic loci. *Nature* **511**, 421–427. [https://www.nature.com/articles/  
432 nature13595](https://www.nature.com/articles/nature13595) (2014) (cit. on p. 6).
- 433 80. *Downloadable schizophrenia predictor* [https://www.med.unc.edu/pgc/  
434 download-results/scz/](https://www.med.unc.edu/pgc/download-results/scz/). Accessed: 2022-05-30 (cit. on p. 6).
- 435 81. Privé, F. *et al.* Portability of 245 polygenic scores when derived from the UK Biobank  
436 and applied to 9 ancestry groups from the same cohort. *American Journal of Human  
437 Genetics* **109**, 12–23. ISSN: 15376605 (2022) (cit. on p. 8).
